# Supplementary material for: A Review on the Current Treatment Paradigm in High-Risk Prostate Cancer
Source: MDPI journal article supplement (doi:10.3390/cancers13174257), 2021-08-24
Supplement: s1 [file s1]

| Treatment Modality                | Advantages                                                                                                      | Disadvantages                                                                                                                                          | Evidence                                                                                                                                               |                                                                                                                                                                                                |
|-----------------------------------|-----------------------------------------------------------------------------------------------------------------|--------------------------------------------------------------------------------------------------------------------------------------------------------|--------------------------------------------------------------------------------------------------------------------------------------------------------|------------------------------------------------------------------------------------------------------------------------------------------------------------------------------------------------|
| <b>Radiotherapy</b>               |                                                                                                                 |                                                                                                                                                        | Studies                                                                                                                                                | Outcomes                                                                                                                                                                                       |
| <i>Dose Escalation</i>            |                                                                                                                 |                                                                                                                                                        |                                                                                                                                                        |                                                                                                                                                                                                |
| Brachytherapy Boost               | Long-term durable improvement in biochemical control vs. EBRT boost<br>No change in GU morbidity with HDR boost | No overall survival benefit vs. EBRT boost<br>Increased acute and late GU morbidity with LDR boost<br>Trend towards increased GI morbidity             | ASCENDE-RT: dose-escalation with LDR brachytherapy boost vs. EBRT boost                                                                                | 15-year biochemical progression-free survival 80% with brachytherapy boost vs. 53% with EBRT boost<br>GU morbidity higher in LDR brachytherapy arm                                             |
| Focal Lesion Boost                | Improved biochemical control vs. no boost<br>No increased GI or GU toxicity                                     | No benefit to prostate cancer-specific survival or overall survival apparent too date<br>Dominant intraprostatic lesion delineation requires expertise | FLAME: mpMRI-guided focal boost to macroscopically visible tumor vs. no boost                                                                          | 5-year biochemical disease-free survival improved with focal boost (HR: 0.45)                                                                                                                  |
| SBRT                              | Patient convenience<br>Resource allocation                                                                      | Mild increased GU toxicity                                                                                                                             | HYPO-PROST: 15Gy/2 boost vs. Conventional fractionation after 46Gy to pelvis<br><br>HYPO-RT-PC: ultra-hypofractionation vs. conventional fractionation | No difference in 5-year biochemical-free survival, metastasis-free survival or overall survival<br><br>No difference in 5-year failure-free survival<br>Grade 2 or worse GU toxicity 6% vs. 2% |
| <i>Elective Nodal irradiation</i> | Two studies that demonstrate improved biochemical control                                                       | Longer follow-up is required<br>True value yet to be clarified but awaiting RTOG 0924                                                                  | RTOG 0534: prostate bed RT alone vs. addition of ADT vs. ADT + elective nodal EBRT                                                                     | 5-year biochemical progression-free survival 71%, 83% and 89%, respectively                                                                                                                    |

|                                        |                                                                                                                                                                                 |                                                                                                                                                                                                         |                                                                                                      |                                                                                                                                                                                                                 |
|----------------------------------------|---------------------------------------------------------------------------------------------------------------------------------------------------------------------------------|---------------------------------------------------------------------------------------------------------------------------------------------------------------------------------------------------------|------------------------------------------------------------------------------------------------------|-----------------------------------------------------------------------------------------------------------------------------------------------------------------------------------------------------------------|
|                                        |                                                                                                                                                                                 |                                                                                                                                                                                                         | POP-RT: whole pelvis EBRT vs. prostate only EBRT in high-risk N0 patients                            | Whole pelvis EBRT improved 5-year biochemical progression-free survival (HR: 0.23), 5-year disease-free survival (HR: 0.40) and 5-year metastasis-free survival (HR: 0.35), but did not impact overall survival |
| <b>Systemic Therapy</b>                |                                                                                                                                                                                 |                                                                                                                                                                                                         |                                                                                                      |                                                                                                                                                                                                                 |
| <i>ADT</i>                             |                                                                                                                                                                                 |                                                                                                                                                                                                         |                                                                                                      |                                                                                                                                                                                                                 |
| Adjuvant (concurrent and following RT) | Improved time until progression and reduced incidence of metastases vs. neoadjuvant                                                                                             |                                                                                                                                                                                                         | Meta-analysis of OTT-0101 and RTOG 9413: adjuvant vs. neoadjuvant ADT                                | Reduced risk of metastasis with adjuvant ADT (HR: 1.40) and absolute difference of 10.8 months in mean survival time for progression                                                                            |
| <i>Docetaxel</i>                       | Improved 4-year overall survival when combined with RT + ADT (in RTOG 0521)<br>Improved relapse-free survival (in GETUG-12)<br><br>Improved failure-free survival (in STAMPEDE) | Adverse events doubled with addition of docetaxel (in RTOG 0521)<br>No difference in metastasis-free survival or cancer-specific survival (in GETUG-12)<br>No benefit to overall survival (in STAMPEDE) | RTOG 0521: RT + ADT + docetaxel vs. RT + ADT<br><br>GETUG-12: ADT + docetaxel + extramustine vs. ADT | 4-year overall survival 93% vs. 89%<br><br>Significantly improved 12-year relapse-free survival (HR 0.75), but no difference in metastasis-free survival or cancer-specific survival                            |

|                        |                                                                                                                                                                                                     |                                                                   |                                                                                                                                                                                                     |                                                                                                                                   |
|------------------------|-----------------------------------------------------------------------------------------------------------------------------------------------------------------------------------------------------|-------------------------------------------------------------------|-----------------------------------------------------------------------------------------------------------------------------------------------------------------------------------------------------|-----------------------------------------------------------------------------------------------------------------------------------|
|                        |                                                                                                                                                                                                     |                                                                   | STAMPEDE: standard of care + docetaxel vs. standard of care                                                                                                                                         | Improved failure-free survival (HR 0.70), but no overall survival benefit                                                         |
| <i>Abiraterone</i>     | Improved failure-free survival and overall survival vs. ADT                                                                                                                                         |                                                                   | STAMPEDE: ADT vs. ADT + abiraterone + prednisone                                                                                                                                                    | Improved failure-free survival (HR: 0.21) and overall survival (HR: 0.61)                                                         |
| <i>Immunotherapy</i>   | Evidence of benefit in metastatic castrate-resistant setting                                                                                                                                        | No level 1 evidence of benefit in high-risk setting               | KEYNOTE-1999: metastatic castrate-resistant prostate cancer treated with pembrolizumab                                                                                                              | Disease control varied with PD-L1 expression and varied between 9% and 22%                                                        |
| <i>PARP inhibitors</i> | Identifying more genes that are important in biological aggressiveness of prostate cancer that can potentially be targeted<br>Mounting evidence of utility in metastatic castrate-resistant setting | No level 1 evidence of benefit in high-risk setting               | PROfound: metastatic castrate-resistant prostate cancer with alteration in BRCA1, BRCA2 or ATM or alterations in 12 other DNA damage repair genes treated with olaparib or enzalutamide/abiraterone | Improved progression-free survival (HR: 0.34) with median overall survival of 18.5 months in cohort A and 15.1 months in cohort B |
| <b>Surgery</b>         | Some retrospective reviews suggest similar outcomes with RT<br>Greater use of MRI and PET may select patients appropriate for surgery                                                               | No randomized data comparing surgery and RT in high-risk patients | No prospective data                                                                                                                                                                                 |                                                                                                                                   |

**Table S1.** The advantages and disadvantages of various treatment options in the management of patients with high-risk prostate cancer.
